# Supplementary material for: Green synthesis of CuO nanoparticles using thyme extract and their application as cephalexin carriers against Klebsiella pneumoniae
Source: Royal Society of Chemistry journal article supplement (doi:10.1039/d5na00726g), 2025-11-11
Supplement: d5na00726g1.pdf [file d5na00726g1.pdf]

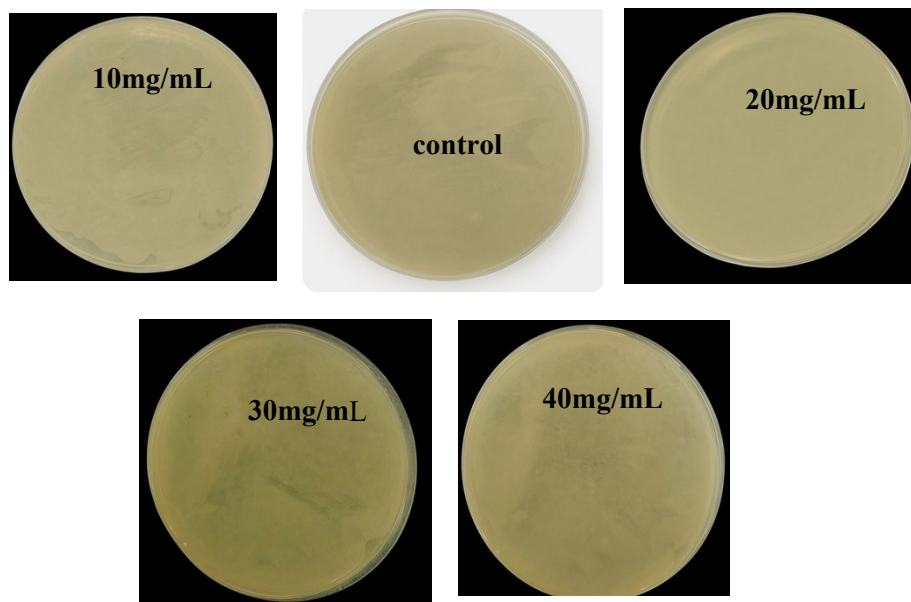

. S1: Effective resistance of *Klebsiella pneumoniae* to cephalixin at different concentrations

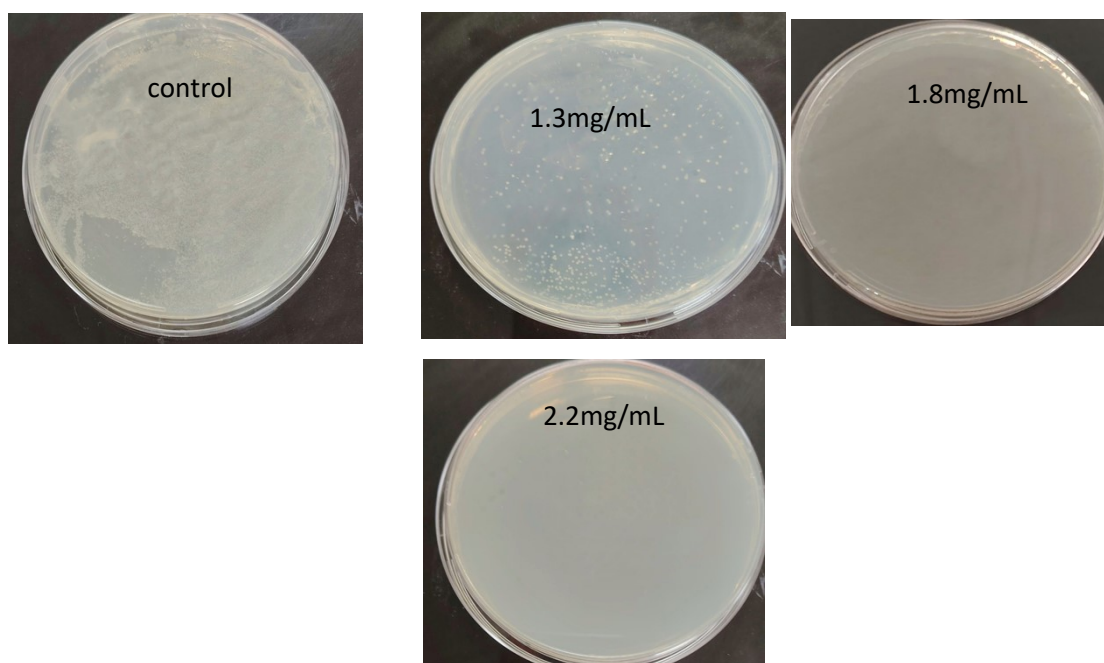

S2: Antibacterial activity of different concentration of aqueous CuO-NPs
